# The Development of Active Binocular Vision under Normal and Alternate Rearing Conditions

Lukas Klimmasch<sup>1</sup>, Johann Schneider<sup>1</sup>, Alexander Lelais<sup>1</sup>, Bertram E. Shi<sup>2</sup>, Jochen Triesch<sup>1</sup>

\*For correspondence:

[klimmasch@fias.uni-frankfurt.de](mailto:klimmasch@fias.uni-frankfurt.de)  
(FMS); [triesch@fias.uni-frankfurt.de](mailto:triesch@fias.uni-frankfurt.de)  
(FS)

<sup>1</sup>Frankfurt Institute for Advanced Studies, Frankfurt am Main, Germany; <sup>2</sup>Department of Electronic and Computer Engineering, Hong Kong University of Science and Technology, Hong Kong, China

**Abstract** The development of binocular vision is an active learning process comprising the development of disparity tuned neurons in visual cortex and the establishment of precise vergence control of the eyes. We present a computational model for the learning and self-calibration of active binocular vision based on the Active Efficient Coding framework, an extension of classic efficient coding ideas to active perception. Under normal rearing conditions, the model develops disparity tuned neurons and precise vergence control, allowing it to correctly interpret random dot stereograms. Under altered rearing conditions modeled after neurophysiological experiments, the model qualitatively reproduces key experimental findings on changes in binocularity and disparity tuning. Furthermore, the model makes testable predictions regarding how altered rearing conditions impede the learning of precise vergence control. Finally, the model predicts a surprising new effect that impaired vergence control affects the statistics of orientation tuning in visual cortical neurons.

## Introduction

Humans and other species learn to perceive the world largely autonomously. This is in sharp contrast to today's machine learning approaches (*Kotsiantis et al., 2007; Jordan and Mitchell, 2015*), which typically use millions of carefully labeled training images in order to learn to, say, recognize an object or perceive its three-dimensional structure. How can biological vision systems learn so much more autonomously? The development of binocular vision presents a paradigmatic case for studying this question. This development is an active process that includes the learning of appropriate sensory representations and the learning of precise motor behavior. Species with two forward facing eyes learn to register small differences between the images projected onto the left and right retinas. These differences are called binocular disparities and are detected by populations of neurons in visual cortex (*Kandel et al., 2000; Blake and Wilson, 2011*) that have receptive subfields in both eyes. Frequently, they are modeled using separate Gabor-shaped filters for each eye, where the disparity is encoded by a shift in the centers of the filters, a difference between their phases, or by a combination of both (*Fleet et al., 1996; Chen and Qian, 2004*). The responses of such disparity tuned neurons can be used to infer the three-dimensional structure of the world. At the same time, we also learn to align our eyes such that the optical axes of our two eyes converge on the same point of interest. These so-called vergence eye movements are also learned and fine-tuned during development (*Held et al., 1980; Fox et al., 1980; Stidwill and*

41 *Fletcher, 2017*). Again, this learning does not require any obvious help from outside, but must rely  
42 on some form of self-calibration.

43 While it has long been argued that the development of disparity tuning and vergence eye move-  
44 ments are interdependent (*Hubel and Wiesel, 1965*), it has been only recently that computational  
45 models have tried to explain how the learning of disparity tuning and vergence eye movements  
46 are coupled and allow the visual system to self-calibrate (*Franz and Triesch, 2007; Zhao et al.,*  
47 *2012; Klimmasch et al., 2017; Eckmann et al., 2019*). These models have been developed in the  
48 framework of Active Efficient Coding (AEC), which is an extension of Barlow's classic efficient coding  
49 hypothesis to active perception (*Barlow, 1961*). In a nutshell, classic efficient coding argues that  
50 sensory systems should use representations that remove redundancies from sensory signals to  
51 encode them more efficiently. Therefore, sensory representations should be adapted to the statis-  
52 tics of sensory signals. Based on this idea, a wide range of data on tuning properties of sensory  
53 neurons in different modalities have been explained from a unified theoretical framework (*Dan*  
54 *et al., 1996; Vinje and Gallant, 2000; Simoncelli, 2003; Smith and Lewicki, 2006; Doi et al., 2012*).  
55 AEC goes beyond classic efficient coding by acknowledging that developing sensory systems shape  
56 the statistics of sensory signals through their own behavior. This gives them a second route for  
57 optimizing the encoding of sensory signals by adapting their behavior. In the case of binocular  
58 vision, for example, the control of vergence eye movements is shaping the statistics of binocular  
59 disparities. By simultaneously optimizing neural tuning properties and behavior, AEC models have  
60 provided the first comprehensive account of how humans and other binocular species may self-  
61 calibrate their binocular vision through the simultaneous learning of disparity tuning and vergence  
62 control.

63 A generic AEC model has two components. The first component is an efficient coding model that  
64 learns to encode sensory signals by adapting the tuning properties of a population of simulated  
65 sensory neurons (*Olshausen et al., 1996; Olshausen and Field, 1997*). In the case of binocular  
66 vision, this is a population of visual cortical neurons receiving input from the two eyes that learns to  
67 encode the visual signals via an efficient code. The second component is a reinforcement learning  
68 (RL) model that learns to control the behavior. In the case of binocular vision, this component  
69 will learn to control eye vergence. For this, it receives as input the population activity of the visual  
70 neurons and learns to map it onto vergence commands. This learning is guided by an internally  
71 generated reward signal, which reinforces movements that lead to a more efficient encoding of  
72 the current visual scene. For example, when the eyes are aligned on the same point, the left and  
73 right images become largely redundant. The efficient coding model can exploit this redundant  
74 structure in both eyes, by developing neurons tuned to small or zero disparities. Conversely, such  
75 binocular neurons tuned to small disparities will represent any remaining misalignments of the  
76 eyes, providing informative input for vergence control. In this way, learning of vergence control  
77 supports the development of neurons tuned to small disparities and this developing population of  
78 neurons in turn facilitates the learning of fine vergence control (*Zhao et al., 2012*).

79 Importantly, however, this normal development of binocular vision is impaired in a range of  
80 alternate rearing conditions. In fact, already since the days of Hubel and Wiesel, alternate rearing  
81 conditions have been used to improve our understanding of visual cortex plasticity and function.  
82 Manipulating the input to the visual system during development and observing how the system  
83 reacts to such manipulations has shaped our understanding of visual development until today.  
84 For example, artificially inducing a strabismus leads to drastic changes in the tuning properties  
85 of neurons in visual cortex (*Hubel and Wiesel, 1965*). A comprehensive theoretical account of the  
86 development of binocular vision must therefore also be able to explain the experimentally observed  
87 differences in alternate rearing conditions. Therefore, we here test if a recently proposed AEC model  
88 of the development of binocular vision can reproduce and explain the large range of experimental  
89 findings from different alternate rearing conditions. Indeed, we show that the model qualitatively  
90 captures findings on how different alternate rearing conditions alter the statistics of disparity tuning  
91 and binocularity. Furthermore, the model makes specific novel and testable predictions about

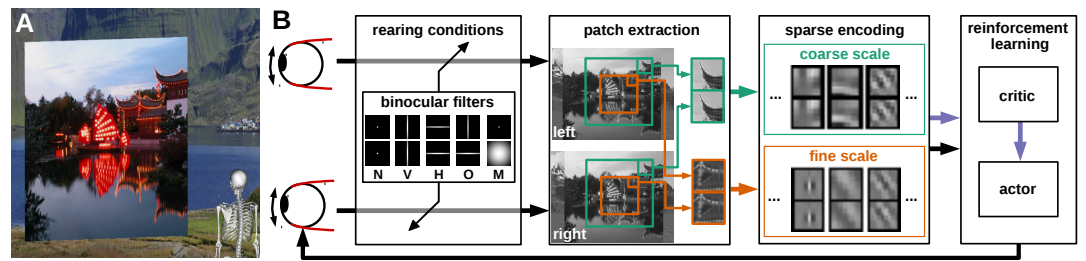

**Figure 1. Model overview.** **A** The agent looking at the object plane in the simulation environment. **B** Processing steps of the active efficient coding model. One image is generated per eye. We convolve them with different kernels, such as those in the inbox, to simulate alternate rearing conditions (N: normal, V: vertical, H: horizontal, O: orthogonal, M: monocular). Binocular patches are extracted in a coarse and a fine scale (green and orange boxes) with different resolutions. These patches are encoded by activations of basis functions via sparse coding and combined with the muscle activations to generate a state vector. While this vector is fed into the reinforcement learning architecture, the sparse coding step also generates a reconstruction error that indicates the efficiency of encoding. We use this signal as reward (purple arrow) to train the critic, which in turn evaluates states to teach the actor. Finally, the actor generates changes in muscle activations, which result in rotations of the eyeballs and a new iteration of the perception-action cycle.

92 differences in vergence behavior under the different rearing conditions. Surprisingly, it also predicts  
93 systematic differences in the statistics of orientation tuning of visual cortical neurons depending  
94 on the fidelity of vergence eye movements. Overall, our results support AEC as a parsimonious  
95 account of the development of binocular vision, highlighting the active nature of this development.

## 96 Results

### 97 A model for the development of active binocular vision

98 The model comprises a virtual agent situated in a simulated environment. The agent looks at a  
99 textured plane, on which images from the man-made section of the McGill Database (*Olmos and*  
100 *Kingdom, 2004a*) are rendered. The plane is positioned in front the agent at variable distances  
101 (Fig. 1A). An image is rendered for the left eye and a second image is rendered for the right eye.  
102 Binocular patches are extracted from these images and encoded by a sparse coding algorithm. The  
103 activation levels of the learned binocular basis functions (BFs) can be thought of as firing rates of  
104 binocular simple cells in primary visual cortex. The basis functions themselves roughly describe their  
105 receptive fields and are optimized through learning (*Olshausen and Field, 1997*). These activations  
106 are then squared and pooled across the image to obtain a more position-invariant representations  
107 mimicking the behavior of complex cells. From this state representation a reinforcement learner  
108 generates vergence commands that symmetrically rotate the eyeballs inwards or outwards. This  
109 results in two new images being rendered and a new simulation iteration starts. The complete  
110 process is depicted in Fig. 1B (see Methods for details).

111 In the human retina, the receptive field (RF) size of ganglion cells increases towards the periphery  
112 (*Curcio et al., 1990*). We incorporate this idea by extracting patches from an input image at two  
113 different spacial scales: A high-resolution fine scale is extracted from the central part and a low-  
114 resolution coarse scale is extracted from a larger area (orange and turquoise boxes in Fig. 1 and 2).  
115 Covering a visual angle of  $8.3^\circ$  in total, the fine scale corresponds to the central/para-central region  
116 (including the fovea) and the coarse scale to the near-peripheral region with a diameter of  $26.6^\circ$ .  
117 On the one hand, this two-scale architecture is more biologically plausible than using just a single  
118 scale, on the other hand it also increases the resulting verging performance (*Lonini et al., 2013*).  
119 One input patch (or subfield) in the coarse scale can detect a disparity of up to  $8.8^\circ$  while one patch  
120 in the fine scale covers  $1.6^\circ$ . The coarse scale can therefore be used to detect big disparities, while  
121 the fine scale represents small disparities.

122 We simulate altered rearing conditions by convolving the input images for the two eyes with two-

123 dimensional Gaussian kernels to blur certain oriented edges, or to simulate monocular deprivation.  
124 To mimic strabismus, the right eyeball is rotated inwards while the left eye remains unchanged to  
125 enforce non-overlapping input to corresponding positions of the left and right retina (see *Methods*  
126 for details).

127 The adaptation of the neural representation and the learning of appropriate motor commands  
128 occur simultaneously: While the sparse coder updates the BFs to minimize the reconstruction error,  
129 the RL agent generates vergence eye movements to minimize the reconstruction error of the sparse  
130 coder. Since the sparse coder has a fixed capacity, minimizing its reconstruction error is equivalent  
131 to maximizing its coding efficiency. Thus, both the sparse coder and the reinforcement learner aim  
132 to maximize the overall coding efficiency of the model.

### 133 **Normal rearing conditions lead to the autonomous learning of accurate vergence** 134 **control for natural input and random dot stereograms**

135 Under normal rearing conditions the joint learning of the neural representation and motor behavior  
136 results in an agent that accurately verges the eyes on the plane in front of it (*Klimmasch et al., 2017*).  
137 This behavior emerges in an autonomous fashion, since both the sparse coder and the RL agent  
138 only strive to improve the neural encoding by reducing the reconstruction error. We demonstrate  
139 this behavior in Video 1 (videos/vergence\_movements.mp4) and will analyse it in greater detail in  
140 the following sections.

141 A critical test of any model of the development of stereoscopic vision is whether it can handle  
142 *random-dot stereograms* (RDSs), which represent the most challenging stimuli for stereopsis. Since  
143 their introduction by *Julesz (1971)* RDSs have been used extensively to investigate the human ability  
144 for stereoscopic vision. Nowadays they are used in ophthalmological examinations to assess stereo  
145 acuity as well as to detect malfunctions in the visual system, such as strabismus or amblyopia  
146 (*Walraven, 1975; Okuda et al., 1977; Ruttum, 1988*). In these experiments participants view a grid  
147 of random dots through a stereoscope or another form of dichoptic presentation. Typically, the  
148 central part is shifted in one of the two images which results in the perception of stereoscopic depth  
149 in healthy subjects. The advantage of this form of examination is that there are no monocular  
150 depth cues (such as occlusion, relative size, or perspective). The impression of depths arises solely  
151 because of the brain's ability to integrate information coming from the two eyes.

152 To show that our model is able to perceive depth in RDS, we generate various RDS and ren-  
153 der the shifted images for the left and right eye separately. We expose the model that was  
154 trained on natural input stimuli to a range of RDS with different spatial frequencies, window  
155 sizes, disparities, and object distances. A video of the performance can be found in Video 2  
156 (videos/performance\_on\_RDS.mp4). The model is clearly able to detect the differences in the  
157 images and align the eyes on the virtual plane that will appear in front or behind the actual object  
158 plane in the RDS. Averaged over all trials, the model achieves a vergence error of  $0.2^\circ$ . This is  
159 comparable with our results on natural images (see Fig. 6) and indicates that the model generalizes  
160 well to artificial images it has never seen before.

### 161 **Altered rearing conditions cause changes in neural representation matching ex-** 162 **perimental findings**

163 A second critical test of any model of the development of binocular vision is whether it can account  
164 for the effects of alternate rearing conditions observed in biological experiments. We simulate such  
165 alternate rearing conditions by filtering the input images for the left and right eyes with Gaussian  
166 filters. Figure 2 shows illustrative examples of the filtered images that were used to train our model  
167 and the respective learned BFs.

168 When the model is trained with unaltered natural visual input, the resulting RFs resemble Gabor  
169 wavelets (*Daugman, 1985*), as shown in the first row in Fig. 2. They appear similar in the coarse  
170 and the fine scale, but tend to be more localized in the latter. The changes that are applied to the  
171 input images in the alternate rearing conditions are reflected in the RFs that are learned: Among

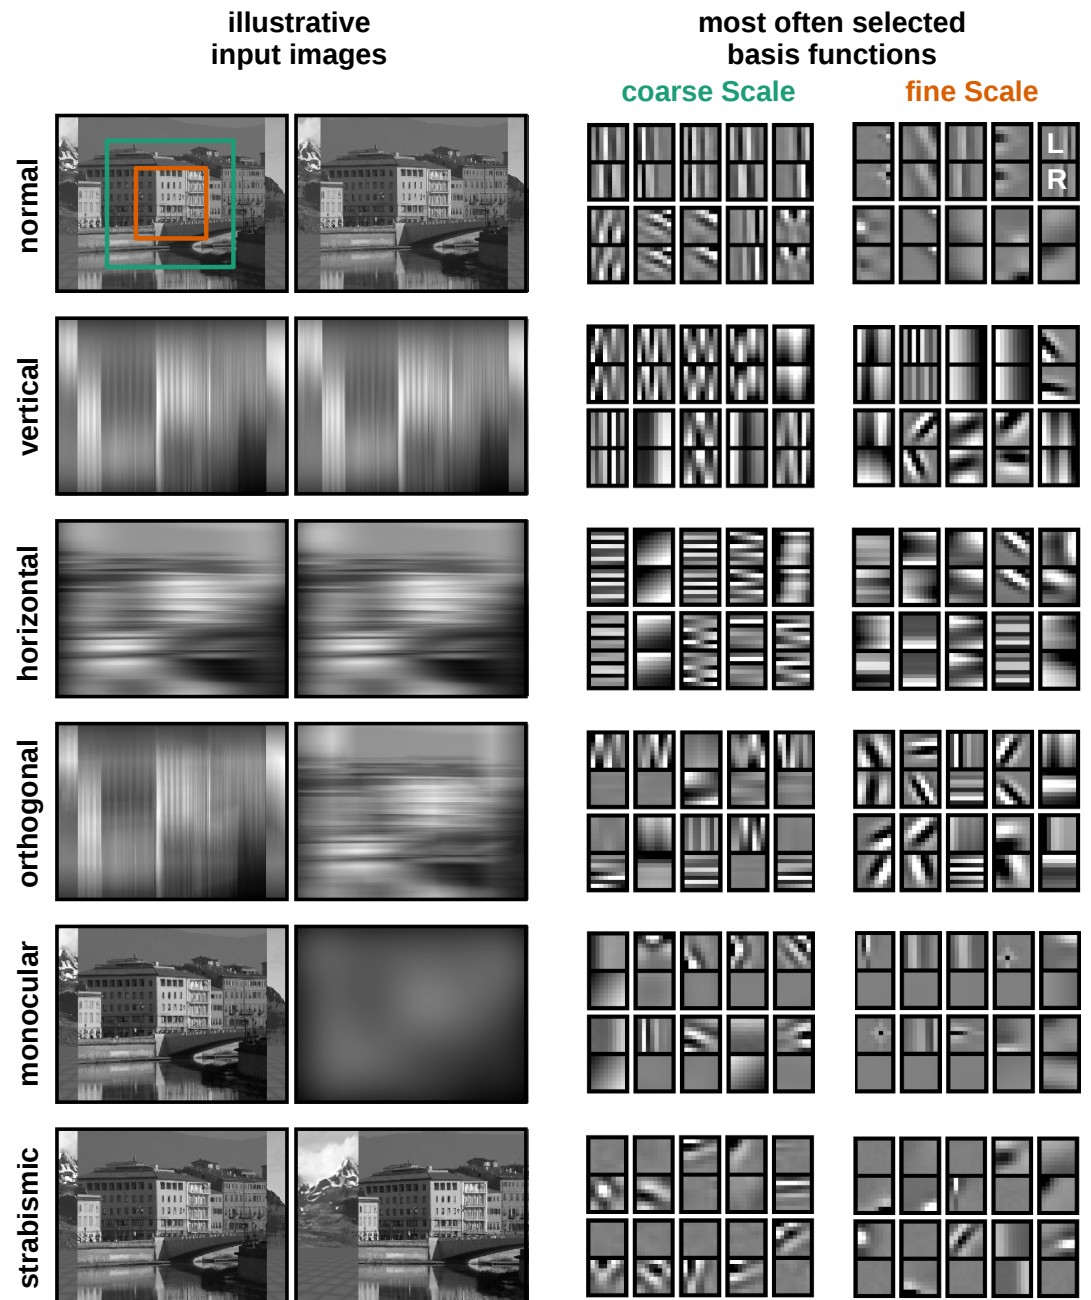

**Figure 2. Input scenarios and learned receptive fields. Left:** Illustration of the input under different rearing conditions. Except for the normal scenario, the images are convolved with different Gaussian filters to blur out certain orientations or simulate monocular deprivation. To simulate strabism the right eye is rotated inward by  $10^\circ$ , so that binocular neurons receive non-corresponding inputs to their left and right eye receptive fields. **Right:** Representative examples of binocular basis functions (BFs) for the fine and coarse scale learned under the different rearing conditions after 0.5 million iterations. For each BF the left eye and right eye patch are aligned vertically. In each case, the 10 BFs selected most frequently by the sparse coding algorithm are shown.

172 the 10 most often selected BFs there are no vertically (horizontally) oriented RFs, when the model  
 173 is trained on images that are deprived of vertical (horizontal) edges. Orthogonal RFs emerge as  
 174 a result of training on orthogonal input. When one eye is deprived of input, the RFs will become  
 175 *monocular* and encode information coming from the “healthy” eye only. Strabismic rearing results  
 176 in the development of monocular RFs without a preference for one or the other eye (*Hunt et al.,*

177 **2013).**

178 The full set of all BFs (coarse and fine scale) for all the rearing conditions can be found in  
179 supplemental Fig. 1. The following sections will analyse them in a more quantitative fashion.

180

### 181 **Neurons' orientation tuning reflects input statistics**

182 To analyze the statistics of the developing RFs in greater detail, we fit oriented two-dimensional  
183 Gabor wavelets to each BF. For this part of the analysis the left and right parts of the binocular  
184 BFs are studied separately, so we look at the *monocular* BF fits only. We combine the results from  
185 coarse and fine scale, since a two-sample Kolmogorov-Smirnov test (*Young, 1977*) did not reveal a  
186 statistically significant difference between the distributions. Only those BFs which met a criterion  
187 for a sufficiently good fit (98% of all bases) are considered for further analysis (see *Methods*).

188 Figure 3 shows how the altered input changes the distribution of preferred orientations of the  
189 BFs. In the *normal* case we can observe a clear over-representation of vertically ( $0^\circ$ ) and horizontally  
190 ( $90^\circ$ ) tuned BFs. This is known as the *oblique effect* and has been frequently observed in animals  
191 (*Appelle, 1972; Li et al., 2003*) and humans (*Furmanski and Engel, 2000*). It has been argued that it  
192 stems from the over-representation of vertical and horizontal edges in natural images (*Coppola  
193 et al., 1998*). Additionally, we cannot exclude the possibility that it is related to the rectangular pixel  
194 grid representing the input to our model.

195 While the distribution of orientations does not change much in the *monocular* and *strabismic*  
196 rearing case, we observe a marked difference to the normal case when certain orientations are  
197 attenuated in the input. The models trained on *vertical* input are missing the peak at horizontal  
198 orientations and vice versa for the *horizontal* case. Additionally, we find an increased number of  
199 neurons tuned to the dominant orientation in the input. These observations are consistent with  
200 animal studies (*Stryker et al., 1978; Tanaka et al., 2006*)

201 The separate analysis of the RFs in the left and right eye for the models that were trained on  
202 *orthogonal* input reveals the adaptation of each eye to its input statistics. Furthermore, we find that  
203 orthogonal RFs developed (also see fourth row in Fig. 2) that have been observed in an orthogonal  
204 rearing study in cats (*Leventhal and Hirsch, 1975*).

205

### 206 **The development of binocular receptive fields requires congruent input to the two 207 eyes**

208 Another interesting feature of the neural representation that has been studied extensively in  
209 the context of alternate rearing is the *binocularity*. The binocularity index (BI) is used to assess how  
210 *responsive* a neuron is to the inputs from the two eyes. A *binocular* neuron requires input from both  
211 eyes to respond maximally, while a *monocular* neuron is mostly driven by just one eye.

212 To determine the binocularity indices for the neurons in our model we use the original method  
213 from *Hubel and Wiesel (1962)*. They determined a stimulus that maximizes the monocular response,  
214 and applying this stimulus separately in left or right eye to get the (monocular) neural responses  $L$   
215 and  $R$  (see *Methods* for details). For each neuron the binocularity index is then calculated as  $\frac{R-L}{R+L}$ .  
216 Like Hubel and Wiesel we sort the binocularity indices into seven bins. The values range from -1  
217 (monocular left) over 0 (binocular) to +1 (monocular right).

218 Figure 4 depicts the binocularity distributions for the coarse and the fine scale for all rearing  
219 conditions. The models that were trained on input that is coherent between the left and right eye  
220 (top row) exhibit the majority of neurons falling in the bin with binocularity index 0. Neurons in this  
221 category receive about the same drive from the left and the right eye. In the *normal* case more  
222 neurons fall into that bin than in the *vertical* and *horizontal* case. This is due to the ability of the  
223 model to perform precise vergence control: Since left and right image are almost identical most of  
224 the time, the great majority of basis functions will develop to encode the exact same input from  
225 both eyes. This, in turn, will result in the cells being completely binocular with a binocularity index  
226 of 0. In the vertical and horizontal case, we observe a reduction in the number of cells that have a

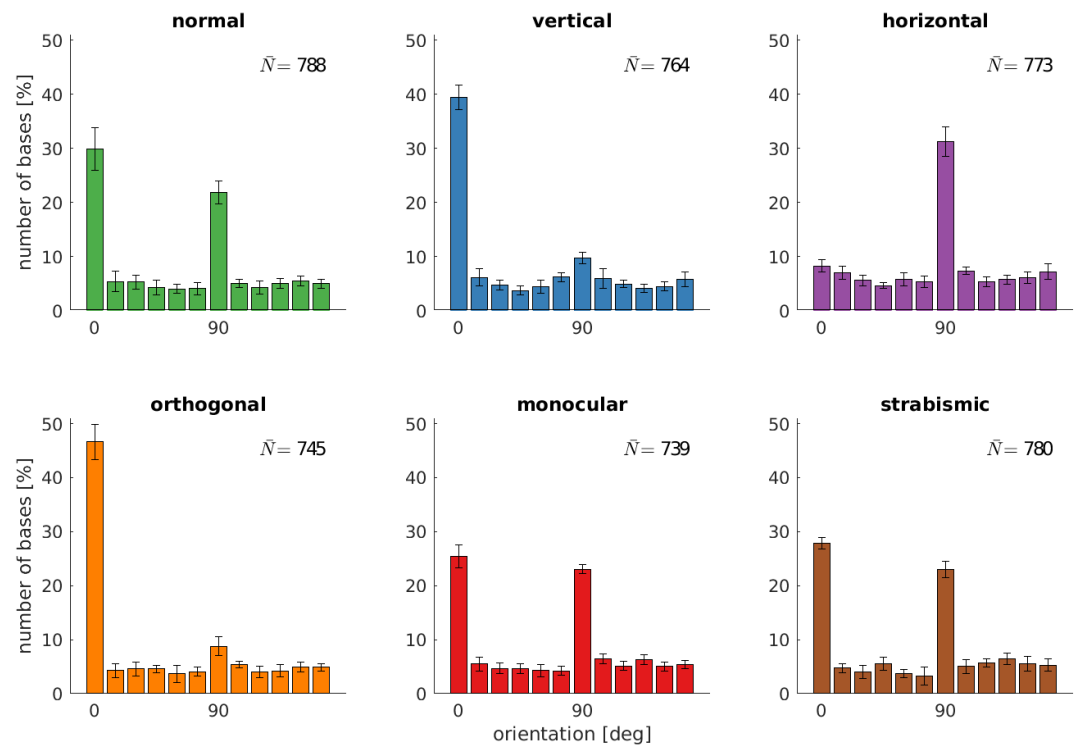

**Figure 3. Orientation distributions for different rearing conditions.** Displayed are the orientations of the Gabor wavelets that were fitted to the learned BFs of the left eye. Shown are the best fits from coarse and fine scale combined (800 in total). The error bars indicate the standard deviation over 5 different simulations.  $\bar{N}$  describes the average number of BFs that passed the selection criterion for their fits (see Methods).

227 binocularity index of 0. We attribute this to the limited vergence performance in these cases, that  
 228 we will analyse in the next sections.

229 If, on the other hand, the input differs qualitatively for the two eyes (Fig. 4, bottom row) the  
 230 receptive fields will also differ in their monocular sub-parts. This can also be observed in Fig. 2 for  
 231 the orthogonal, monocular and strabismic case. Looking at the binocularity index, we find that  
 232 most of the cells become monocular, with a symmetric distribution for orthogonal and strabismic  
 233 rearing. Monocular deprivation of the right eye leads to a distribution of binocularity indices that is  
 234 mostly monocular for the left eye.

235 We also find differences between coarse and fine scale, with slightly fewer binocular and slightly  
 236 more monocular cells in the latter one. This indicates that left and right part of the BFs in the fine  
 237 scale tend to be marginally more different than in the coarse scale. Patches that serve as input to  
 238 this scale are not down-sampled and have a high resolution. Small differences in the input patches  
 239 will therefore not be blurred out and lead to small differences in the learned BFs since the sparse  
 240 coder strives for reconstructing the input as accurately as possible.

241 Looking into the biological data, we find the pronounced peak at binocular neurons in the  
 242 normal case (*Wiesel and Hubel (1963)*, Fig. 1, and *Hubel and Wiesel (1965)*, Fig. 5). When trained on  
 243 inputs deprived of certain orientations (*Stryker et al. (1978)*, Fig. 6B), the neurons become relatively  
 244 more monocular, but most of the neurons remain binocular. This is in good agreement with our  
 245 model.

246 *Stryker et al. (1978)* reared kittens on orthogonal input and report an increase in monocular  
 247 neurons (Fig. 6A) when compared to the normal rearing data from Hubel and Wiesel. In comparison  
 248 to the rearing on stripes, there are fewer binocular cells. The loss of binocular neurons that we see  
 249 in our data is also reported in *Hirsch and Spinelli (1970)*, who reared kittens on orthogonal stripes.

250 Monocular rearing and the analysis of binocularity was performed in *Wiesel and Hubel (1963)*.

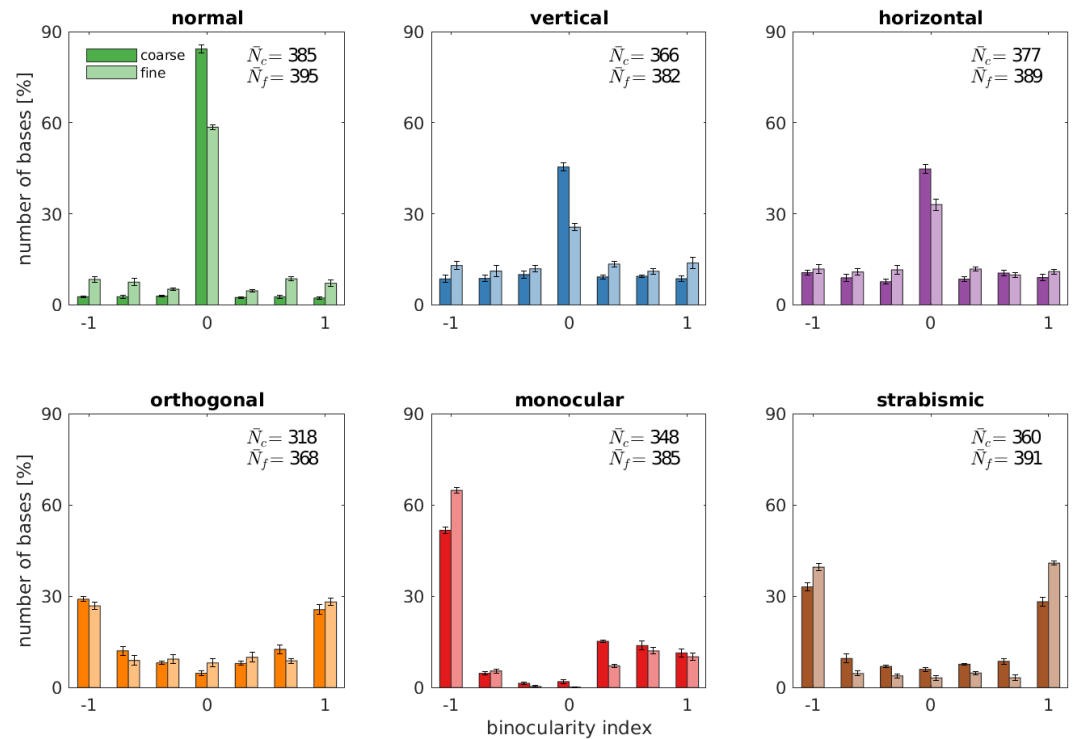

**Figure 4. Binocularity distributions for different rearing conditions.** The binocularity index is calculated by comparing the neuron's responses to monocular stimuli. The values range from -1 (monocular left) over 0 (binocular) to 1 (monocular right). Results for coarse and fine scale are presented next to each other. Error bars indicate the standard deviation over 5 different simulations.  $\bar{N}_c$  and  $\bar{N}_f$  are the average number of basis functions (out of a total of 400) that pass the selection criteria for their fits (see Methods).

251 In Fig. 3 and 5 we see the development of completely monocular cells after visual deprivation of the  
 252 other eye. The strabismic case was studied a few years later in *Hubel and Wiesel (1965)* (Fig. 5A)  
 253 and revealed a division of the neural population in monocular neurons for either left or right eye, in  
 254 agreement with our model.

#### 255 **Alternate rearing conditions reduce the number of disparity tuned cells**

256 A central aspect of the development of binocular vision is the emergence of neurons which are  
 257 tuned to binocular disparities. We therefore investigate how alternate rearing affects the number  
 258 of neurons with disparity tuning in the model and the distribution of their preferred disparities. We  
 259 estimate disparity tuning by considering phase shifts between left and right RFs in the following  
 260 way: We fit binocular Gabor wavelets to the BFs, where all parameters, except for the phase shift,  
 261 are enforced to be identical for the left and right monocular BF. The disparity for one neuron can  
 262 then be calculated as described in *Analysis of receptive fields*. The distribution of disparity tuning of  
 263 the coarse scale neurons is shown in Fig. 5 for the different rearing conditions. Results for the fine  
 264 scale are comparable and presented in supplemental Fig. 2. First, there is a noticeable difference in  
 265 the number of cells that are disparity tuned between the different rearing conditions: In the normal  
 266 case we find the highest number of disparity tuned cells, rearing in a striped environment reduces  
 267 the number, and uncorrelated input results in the smallest number of disparity tuned cells. In every  
 268 case, the distribution of preferred disparities is peaked at zero. The height of this peak is reduced  
 269 for rearing conditions with in-congruent input to the two eyes.  
 270

271 Comparing the normal with the vertical and horizontal case, there is an increase in the number  
 272 of cells that are tuned to non-zero disparities. This indicates that under these alternate rearing  
 273 condition, the agents are exposed to non-zero disparities more often. This is in good agreement



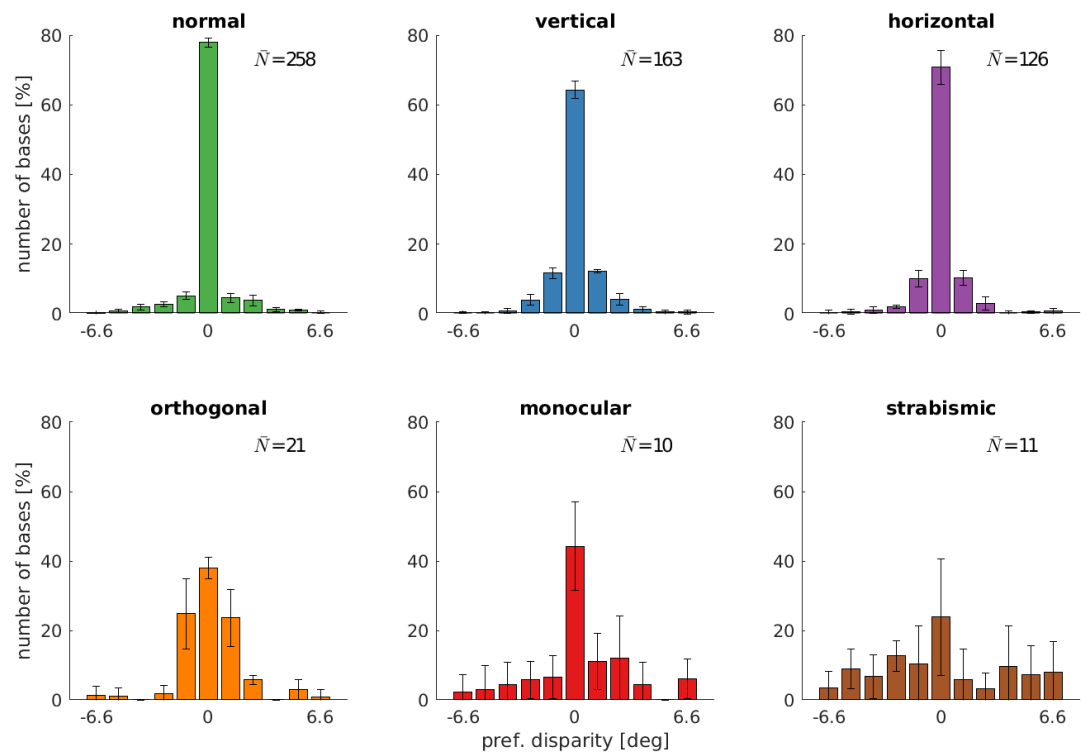

**Figure 5. Disparity distributions for different rearing conditions.** The neuron's preferred disparities are extracted from the binocular Gabor fits. All neurons with a disparity bigger than the maximally detectable one are removed from the analysis. Presented are the averaged data of the coarse scale from 5 random seeds.  $\bar{N}$  describes the average number of neurons that met the selection criteria (see Methods).

274 with the results from the next section (also see Fig. 6), where we will see that those models perform  
 275 less accurate vergence movements compared to the normal case.

276 In the strabismic case, a neuron's receptive fields in left and right eye are driven by un-  
 277 corresponding input. This results in very few disparity tuned cells that exhibit a much broader  
 278 distribution of preferred disparities.

279 To investigate the effect of a less severe strabism we conduct an additional experiment similar  
 280 to *Shlaer (1971)* (see Fig. 2). Here, we fix the strabismic angle to  $3^\circ$ , which results in a corresponding  
 281 image in the two eyes because one input patch in the coarse scale covers an angle of  $6.4^\circ$ . *Sup-*  
 282 *plemental Fig. 3* shows that this leads to an increased amount of disparity tuned cells and a shift  
 283 of their preferred disparity to  $3^\circ$ . Exactly as in *Shlaer (1971)*, the constant exposure to a certain  
 284 disparity leads to a preference to that disparity for the majority of cells.

### 285 **Model predicts how alternate rearing conditions affect vergence learning**

286 While the effect of alternate rearing conditions on receptive fields of visual cortical neurons is well  
 287 studied, there has been little research on the effect of alternate rearing conditions on vergence  
 288 behavior. To quantify vergence behavior in the model, we define the absolute vergence error. It  
 289 measures by how much the vergence angle between the eyes deviates from the ideal position,  
 290 which would make the two eyes fixate the same center of the object. This measurement is taken at  
 291 the end of a fixation (corresponding to the last of 10 time steps), to give the model sufficient time  
 292 to fixate the object.

293 Figure 6A shows the evolution of the absolute vergence error over training time for the different  
 294 rearing conditions. The models with *normal* or *vertical* rearing learn to verge the eyes on the same  
 295 point on the object, resulting in the reduction of the vergence error to small values of around 0.3  
 296 degrees. The model that learns on images without vertical edges (*horizontal* case) does manage to  
 297 verge the eyes slightly, but does not reach the accuracy of the former models. The *orthogonally*,

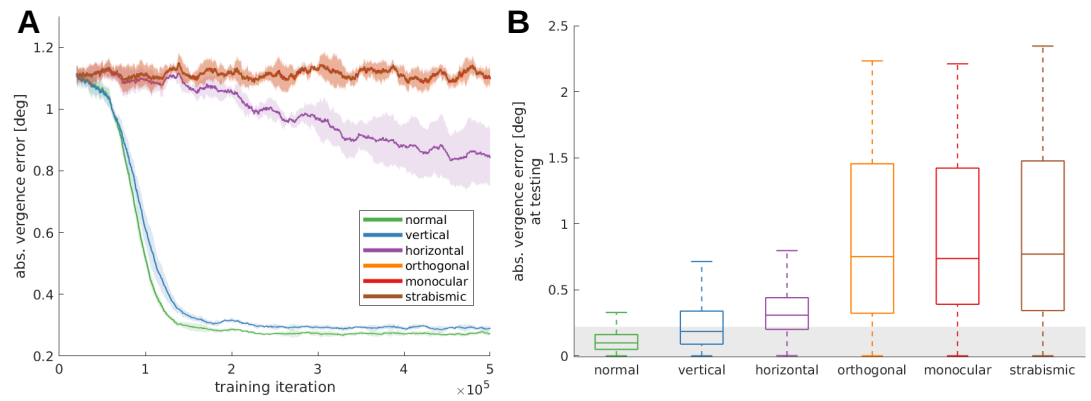

**Figure 6. Vergence performance of models raised under different rearing conditions. A** Moving average of the vergence error over the duration of the training period. During the training, a textured object plane is positioned in front of the agent at varying distances. The vergence error is defined as the difference between the angle that is desired to fixate exactly on the object plane and the actual angle between the eyes. The shadows indicate the standard deviation over 5 different random seeds. **B** Vergence errors after 20 perception-action-cycles on unknown input stimuli starting from various initial errors. This testing was done without the visual aberrations encountered during training. Displayed are conventional box plots without outliers. The gray bar indicates a vergence error of 0.2° which presents the resolution boundary of our system.

298 *monocularly* and *strabismically* reared models do not improve much in comparison to random  
299 behavior in the beginning of training. The main difference to the models that were able to learn  
300 vergence is that under these conditions the left and right eye are provided with in-congruent input.  
301 The orthogonal model receives two monocular images that retain different orientations. The right  
302 monocular image of the monocularly deprived model contains little information at all, and the two  
303 eyes are physically prevented from looking at the same object in the strabismic case. In these cases,  
304 very few neurons with disparity tuning emerge (compare previous section) that could drive accurate  
305 vergence eye movements.

306

### 307 **Behavior after normal visual input is reinstated**

308 Alterations of the visual input during the critical period of visual development lead to lasting  
309 visual deficits. To simulate the effect of a transient alteration of visual input during the critical  
310 period, we first train the model under alternate rearing conditions as described above and then  
311 reinstate normal visual input. For this, we freeze all weights after the training phase and test all  
312 models on the same, un-altered input images. By doing so, we simulate a situation where the visual  
313 aberrations present during development (such as astigmatism or a cataract) are corrected *after* the  
314 critical period.

315 The object plane is put to a distance  $\in [0.5, 1, \dots, 6]$  m, the initial vergence error is chosen  
316 randomly from  $-2$  to  $2^\circ$ , and 40 stimuli that were not seen during training are applied on the object  
317 plane. From these initial conditions we run the simulation for 20 iterations and record the vergence  
318 error at the end of each fixation. The results of this testing procedure are displayed in Fig. 6B. Here,  
319 the gray shaded area indicates a vergence error of 1 pixel. We observe that the *normally* trained  
320 model exhibits the best performance and actually achieves sub-pixel accuracy in the great majority  
321 of trials. Interestingly, the performance declines for the *vertical* model. One could expect the model  
322 that was trained solely on vertical edges to be better at aligning those edges. We attribute this to  
323 mis-alignments (or false matches) between the two images that happen more frequently, when the  
324 world is made up only of vertical edges. Additionally, the neural representation that was learned  
325 during the exposure to vertical edges only might not be utilized as efficiently as before, now that all  
326 orientations are present in the input.

327 Even though the performance of the model trained on only *horizontal* orientations is quite poor

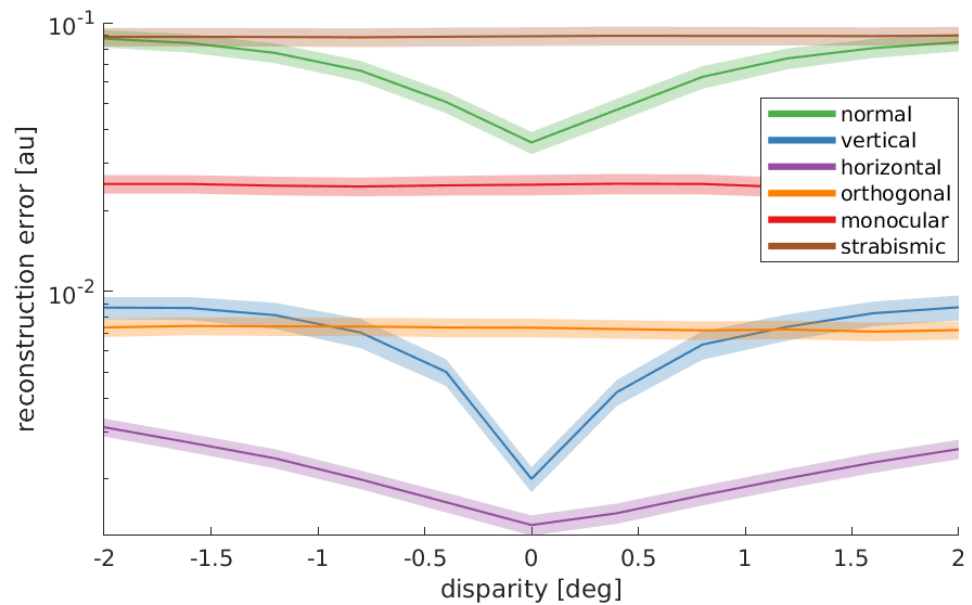

**Figure 7. Reward functions for the different rearing conditions.** The reward function is what drives the reinforcement learner to move the eyes in a useful fashion. For all different conditions, we plot the rewards that the models will receive at different disparities. Notice the log-scale on the y-axis. The data are averaged over 10 stimuli that were not encountered during training, three different object distances (0.5, 3, and 6 m), and 5 random seeds for every condition. The shaded area represents the standard error. Only those models that receive corresponding input in left and right eye display a reconstruction error that is minimal at zero disparity. These are the only models that learn to verge the eyes.

328 during training, after applying the correction it clearly displays a verging behavior. In comparison to  
329 the *orthogonal*, *monocular* and *strabismic* models, it reduces the vergence error, though being less  
330 accurate than the other two cases.

331 The main difference between the conditions under which vergence could or could not be learned  
332 is the correspondence between the input images. When the inputs to the two eyes are in-congruent  
333 — as in the *orthogonal*, *monocular* and *strabismic* cases — we could not observe any improvement  
334 in the vergence error. Matching input, on the other hand, always led to the learning of vergence  
335 behavior. This becomes apparent especially after testing the learned models on un-altered inputs.

336 Since this is the first study to investigate the quality of learned vergence movements after expo-  
337 sure to alternate rearing conditions (to the best of our knowledge), the differences in performance  
338 are a genuine prediction of our model.

339 To explain this phenomenon we consider the reward function, which shapes the model's behav-  
340 ior during training. Figure 7 shows the averaged reconstruction error over three different object  
341 distances and ten stimuli for the different rearing conditions. We defined the reward as the negative  
342 reconstruction error of the sparse coders. In the normal case, we clearly see an optimum of the  
343 reconstruction error at zero disparity. This also holds for the vertical and horizontal condition,  
344 whereas those are at least one magnitude smaller. We argue that the differences in the rewards  
345 lead to the differences in vergence performance, since all models that could not verge display a  
346 reward function that is rather flat for different disparity values. The models with a negative peak  
347 at zero disparity, on the other hand, all learn to verge and the difference in the magnitude of the  
348 reward seems to be reflected in the vergence performance after training.

### 349 **Model predicts how vergence movements influence the statistics of orientation preference** 350 preference

351 Our model also allows us to investigate, for the first time, how the quality of the vergence control  
352 influences the neural representation. As a baseline, we consider the orientation tuning of a

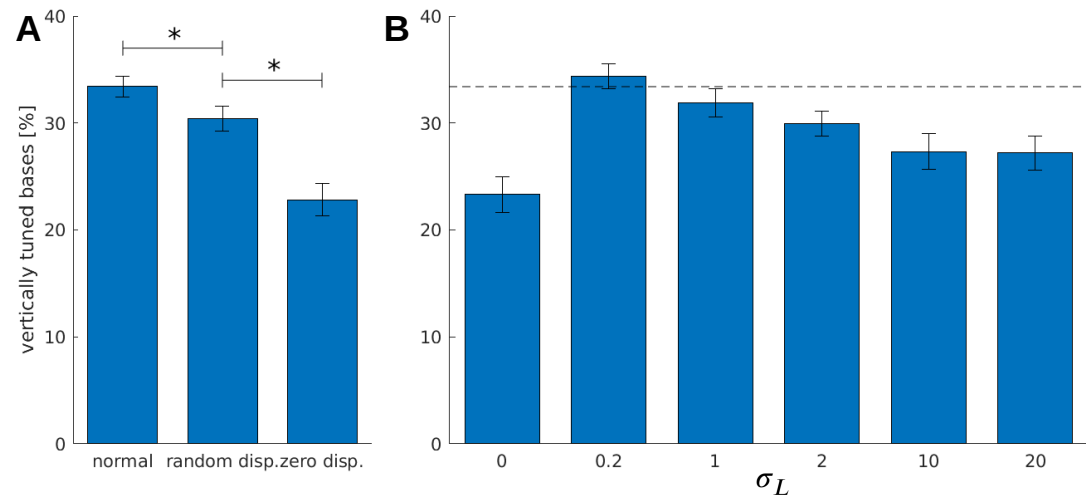

**Figure 8. The effect on the learning of vergence and disparities on the number of neurons tuned to vertical edges.** **A** Here we compare the relative amount of cells that are tuned to vertical orientations for three different types of models: The first is the normal model, where the sparse coder and the RL agent are trained. In the second case, only the sparse coder is trained while the RL agent is removed. During the training procedure, this model is exposed to random disparities in the input images. In the last case, only the sparse coder is trained, but additionally, we artificially set the eyes to always verge perfectly on the objects in front of it. Like that, this model does not learn vergence movements and is not exposed to disparities as well. Asterisks indicate a statistically significant difference between the samples as revealed by the students t-test (p-values are 0.007 and 0.001). **B** These models were trained with a Laplacian distribution of different disparities. Depicted are the relative amount of BFs tuned to vertical orientations in dependence of  $\sigma_L$ , the standard deviation of the Laplacian.  $\sigma_L = 0$  corresponds to 0 disparity all the time, while  $\sigma_L = 20$  is an almost uniform disparity distribution. Error bars indicate the standard deviation over 5 different seeds. The black dotted line indicates the amount of vertically tuned neurons in the *normal* model.

353 reference model which was trained on normal images and learned an appropriate vergence policy.  
354 We compare this model to a version that was trained on the same input images, but could not  
355 verge the eyes. Specifically, the sparse coder was trained normally, but the RL part was removed.  
356 This model saw different disparities during training by looking at objects at different depths, but  
357 was not able to change this distribution of disparities to facilitate the encoding. We refer to this  
358 model as the “random disparity” model. In another version of the model, we artificially always  
359 set the vergence angle to correctly fixate the objects. In this way, this model was never exposed  
360 to disparities (except for very small ones in the periphery that arise because of slightly different  
361 perspectives in the left and right eye). We refer to this version as the “zero disparity” model.

362 Figure 8A shows the fraction of neurons that are tuned to vertical orientations ( $0 \pm 15^\circ$ ) for these  
363 three models. When the influence of the RL agent is removed, we observe a significant decrease in  
364 the number of vertically tuned neurons. This change must be caused by the different distributions  
365 of disparities that the models experience due to their different motor behavior. In the model that  
366 was trained without disparities, we find the least amount of neurons tuned to vertical edges.

367 To study the role of the distribution of experienced disparities more systematically, we train  
368 the sparse coder on different truncated Laplacian distributions of disparities. The distributions  
369 are heavy-tailed and centered around zero. The spread in this distribution is determined by the  
370 standard deviation  $\sigma_L$ .  $\sigma_L = 0$  means zero disparity all the time (corresponding to the zero disparity  
371 case), while the distribution becomes almost uniform for big values of  $\sigma_L$ . Figure 8B shows how  
372 the number of vertically tuned neurons changes in response to different values of  $\sigma_L$ . We find  
373 the smallest number of vertically tuned cells when the disparity is zero throughout the whole training.  
374 For very large  $\sigma_L$  there are more vertical cells, but not as many as for smaller values which are  
375 different from zero. In fact for  $\sigma_L = 0.2$ , which corresponds to a standard deviation of one pixel in

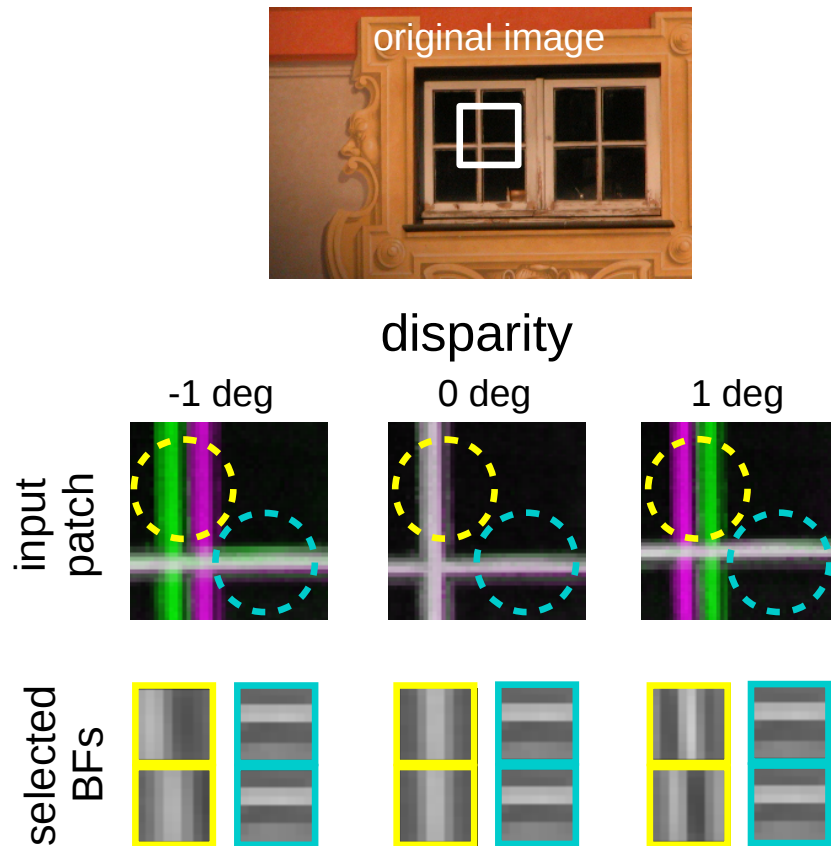

**Figure 9. Intuition for the over-representation of vertical edges when disparities have to be encoded.** We show the location of two RFs (yellow and cyan circles) on a patch in the visual field and present them with three different disparities. The inputs are depicted as anaglyphs, compositions of two images where the left image goes into the green channel and the right into a magenta channel. When the two images are corresponding, the anaglyph will appear in black and white, while un-corresponding parts will appear in green and magenta. For each disparity and RF we show the BF that is selected by the sparse coder to encode the input. While the BF that encodes the input in the cyan RF is the same for all disparities, the input inside the yellow RF can best be reconstructed by BFs that are tuned to that exact disparity.

376 the input image, the number of vertically tuned neurons is maximized.

377 An intuitive explanation for this over-representation of cells tuned to vertical orientations is given  
378 in Fig. 9. Here, we depict a part of an input image at three different disparities. While the horizontal  
379 edge can be encoded by the same BF for all disparity values, the vertical edge demands three  
380 different basis functions to represent the input pattern faithfully. A system that experiences these  
381 disparities in its inputs, needs to devote neural resources to represent them all. If the distribution  
382 of disparities becomes too wide, however, individual neurons will receive close to independent  
383 input from both eyes and disparities that lie in the range that can be represented by a single basis  
384 function will be rare.

### 385 Discussion

386 A major goal of Computational Neuroscience is the development of models that explain how the  
387 tuning properties of neurons develop and how they contribute to the behavior of the organism.  
388 Over the last decades, the dominant theoretical framework for understanding the development of  
389 tuning properties of sensory neurons has been the *efficient coding hypothesis*. It states that sensory  
390 tuning properties adapt to the statistics of the sensory signals. In this framework, the behavior of

391 the organism has been largely neglected, however. Specifically, there has been hardly any work on  
392 how developing neural tuning properties shape behavior, how the developing behavior affects the  
393 statistics of sensory signals, and how these changing statistics feed back on neural tuning properties.  
394 We argue that understanding the development of sensory systems requires understanding this  
395 feedback cycle between the statistics of sensory signals, neural tuning properties and behavior.

396 The *active efficient coding* (AEC) approach offered here extends classic theories of efficient coding  
397 by a behavior component to study this feedback cycle in detail. Here we have focused on active  
398 binocular vision, where a simulated agent autonomously learns to fixate a target object with both  
399 eyes via vergence eye movements. All parts of our model self-organize in tandem to optimize  
400 overall coding efficiency. We have shown that that our model can autonomously self-calibrate  
401 and even perform accurate vergence on random dot stereograms, despite having never been  
402 exposed to such stimuli. In addition, we have reproduced various animal studies on alternate  
403 rearing conditions, which often show dramatic effects on neural representations and behavior.  
404 Our simulation results are in qualitative agreement with experimental findings, lending additional  
405 support to our model. Beyond explaining a range of experimental findings, our model also predicts  
406 systematic changes in the learned vergence behavior in response to altered regarding conditions.  
407 In addition, the model predicts that the learning of accurate vergence behavior systematically  
408 influences the neural representation and offers a novel explanation for why vertical orientations  
409 tend to be over-represented in visual cortex compared to horizontal ones, at least in primates  
410 (*De Valois et al., 1982b*) and humans (*Yacoub et al., 2008; Sun et al., 2012*). These predictions  
411 should be tested in future experiments. For example, in enucleated animals, a bias in favor of  
412 vertical orientations over horizontal ones may be reduced or completely absent (*Fregnac et al.,*  
413 *1981*).

414 By freezing the neural network after the training period, we also simulated the state of the  
415 brain after the critical period. Even after fixing the optical aberrations present during training we  
416 observed a reduced vergence performance for all alternate rearing regimes. This finding is in line  
417 with a large body of evidence suggesting that optical aberrations should be corrected as early as  
418 possible to facilitate healthy development of binocular vision (e.g. *Daw (1998); Fawcett et al. (2005),*  
419 *but also see Ding and Levi (2011)*).

420 While our results qualitatively match experimental findings, there are some quantitative dif-  
421 ferences. In particular, while the distribution of binocularity indices (*Wiesel and Hubel, 1963*) and  
422 disparities (*Sprague et al., 2015*) in healthy animals are relatively broad (*De Valois et al., 1982a;*  
423 *Stevenson et al., 1992; Ringach et al., 1997*), we find more narrow ones in our model. These differ-  
424 ences are likely due to a number of simplifications present in our model. In the brain, inputs from  
425 both eyes into primary visual cortex are organized into ocular dominance bands such that individual  
426 cortical neurons may receive input which is already biased towards one or the other eye (*Le Vay*  
427 *et al., 1980; Crowley and Katz, 2000*). In contrast, in our model all neurons receive similar amounts  
428 of input from both eyes and are therefore already predisposed for becoming binocular cells. This  
429 might explain the model's narrower distribution of binocularity indices. Regarding the distribution  
430 of preferred disparities, animals raised under natural conditions will experience a broad range of  
431 disparities in different parts of the visual field, since objects in different locations will be at different  
432 distances. In the model, the visual input is quite impoverished, as it is dominated by a single large  
433 frontoparallel textured plane. Once this plane is accurately fixated, most parts of the visual field will  
434 appear at close to zero disparity. This may explain the narrower distribution of preferred disparities  
435 observed in the model.

436 Similarly, the distribution of preferred orientations in our model shows a very strong preference  
437 for horizontal and vertical, that is accentuated relative to the normal oblique effect (*Li et al., 2003;*  
438 *De Valois et al., 1982b*). Possible reasons for this include the discrete, rectangular pixel grid with  
439 which visual inputs are sampled, the choice of our image data base (*Olmos and Kingdom, 2004a*),  
440 which contains mostly man-made structures including buildings, etc., for which it is known that  
441 they contain an abundance of horizontal and vertical edges (*Coppola et al., 1998*), and the model's

442 restriction to the central portion of the visual field, where the oblique effect is more pronounced  
443 (*Rothkopf et al., 2009*).

444 Next to addressing the above limitations, an interesting topic for future work is to use the model  
445 to study the development of amblyopia. For this, we have recently incorporated an interocular  
446 suppression mechanism, since suppression is considered a central mechanism in the develop-  
447 ment of amblyopia (*Eckmann et al., 2019*). Such models could be a useful tool for predicting the  
448 effectiveness of novel treatment methods (*Papageorgiou et al., 2019; Gopal et al., 2019*).

449 In conclusion, we have presented a computational model that sheds new light on the central role  
450 of behavior in the development of binocular vision. The model highlights how stimulus statistics,  
451 sensory representation and behavior are all inter-dependent and influence one another and how  
452 alternate rearing conditions affect every aspect of this system. The Active Efficient Coding approach  
453 pursued here may be suitable for studying various other sensory modalities across species.

## 454 Methods

455 The following paragraphs will describe the different stages of the model, the experimental setup,  
456 and the analysis. The implementation is publicly available at <https://github.com/Klimmasch/AEC/>.

### 457 Image processing

458 We use OpenEyeSim (*Priamikov and Triesch, 2014; Priamikov et al., 2016*) to render the left and  
459 right eye image. It comprises a detailed biomechanical model of the human oculomotor system and  
460 simulates a 3-dimensional environment. A rectangular plane is moved in front of the learning agent  
461 (perpendicular to the gaze direction). On it we apply greyscale textures from the McGill Calibrated  
462 Color Image Database (*Olmos and Kingdom, 2004b*) to simulate objects at different depths.

463 The two monocular images rendered by OpenEyeSim cover a horizontal field of view of  $50^\circ$  and  
464 have  $320 \text{ px} \times 240 \text{ px}$  (focal length  $F = 257.34 \text{ px}$ ). We use Matlab to extract single patches in different  
465 resolutions and combine corresponding patches from the left and right image. These binocular  
466 patches will be jointly encoded by the sparse coder. The *coarse scale* corresponds to  $128 \text{ px} \times 128 \text{ px}$   
467 in the original image (corresponds to  $26.6^\circ \times 26.6^\circ$ ) and is down-sampled by a factor of 4 to  $32 \text{ px} \times 32 \text{ px}$ .  
468 The *fine scale* image corresponds to  $40 \text{ px} \times 40 \text{ px}$  ( $8.3^\circ \times 8.3^\circ$ ) and is not down-sampled. From coarse  
469 and fine scale we extract  $8 \text{ px} \times 8 \text{ px}$  patches with a stride of 4 px and combine corresponding left  
470 and right patches to  $16 \text{ px} \times 8 \text{ px}$  binocular patches (see Fig. 1). One patch in the coarse scale covers  
471 a visual angle of  $6.6^\circ$  and in the fine scale one patch covers  $1.6^\circ$ . In total, we generate 81 fine scale  
472 and 49 coarse scale patches that are subsequently normalized to have zero mean and unit norm.

### 473 Sparse coding

474 The patches from coarse and fine scale are used in the sparse coding step to construct a neural  
475 representation of the visual input and to generate a reward signal that indicates the efficiency  
476 of this encoding. Each scale  $S \in \{c, f\}$  comprises a dictionary of binocular basis functions (BF)  
477  $\phi_{S,i} \in \mathcal{B}_S$  with  $|\mathcal{B}_S| = 400$ . Each patch  $p_{S,j}$  is reconstructed by a sparse linear combination of 10 BF:

$$\hat{p}_{S,j} = \sum_{i=1}^{|\mathcal{B}_S|} \kappa_{S,i}^j \phi_{S,i}, \quad (1)$$

478 where the vector of activations  $\kappa_S^j$  is allowed to have only 10 non-zero entries. The  $\kappa_S^j$  are chosen  
479 by *matching pursuit* (*Mallat and Zhang, 1993*). This greedy algorithm selects the 10 BF from the  
480 respective dictionary that yield the best approximation  $\hat{p}_{S,j}$  of a patch.

481 The reconstruction error  $E_S$  is calculated as the sum over all squared differences between all  
482 patches and their approximations, normalized by the total energy in the input patches:

$$E_S = \sum_{j=1}^{|p_S|} \frac{\|p_{S,j} - \hat{p}_{S,j}\|^2}{\|p_{S,j}\|^2}. \quad (2)$$

483 The total reconstruction error  $E = E_c + E_f$  is used as the negative reward (see following section)  
 484 while the errors for each scale are used to update the BF (*Olshausen et al., 1996*).

485 The state representation is given by a feature vector, where every entry describes the mean  
 486 squared activation of one BF over the whole input image:

$$F_{S,i} = \sum_{j=1}^{|p_S|} \frac{(\kappa_{S,i}^j)^2}{|p_S|} . \quad (3)$$

487 Taken together, this feature vector  $F$  has  $2|B_S|$  entries for both scales combined.

### 488 **Generation of motor commands**

489 The angular position of the eyes are controlled by two extra-ocular eye muscles responsible for  
 490 rotations around the vertical axis. This *medial* and *lateral rectus* are simulated utilizing an elaborate  
 491 muscle model (*Umberger et al., 2003*) inside OpenEyeSim (*Priamikov and Triesch, 2014; Priamikov*  
 492 *et al., 2016*). Since we are interested in vergence movements only, we assume symmetrical eye  
 493 movements so that the activities of the two muscles are mirrored for both eyes.

494 To generate those activations (between [0, 1] in arbitrary units) we use reinforcement learn-  
 495 ing (*Sutton and Barto, 1998*). Specifically, the model employs the CACLA+VAR algorithm from  
 496 *Van Hasselt and Wiering (2007)* that generates outputs in continuous action space. In short, it  
 497 uses an actor-critic architecture (*Grondman et al., 2012*), where the actor and critic use neural  
 498 networks as function approximators. These neural networks receive the state vector  $s_t$  that is the  
 499 concatenation of the BF activations from both scales (see previous section) and the current muscle  
 500 innervations. The entries in  $s_t$  are scaled by Welford's algorithm (*Welford, 1962*) to have zero mean  
 501 and a fixed standard deviation (0.02 in our simulations).

502 The critic is a one-layer network that aims to learn the value of a state. From the state vector it  
 503 approximates the discounted sum of all future rewards

$$V(s_t) = \sum_{i=0}^{\infty} \gamma^i r_{t+i} , \quad (4)$$

504 where  $r_t$  represents the reward achieved at time  $t$  and  $\gamma$  is the discount factor. To update this  
 505 value network, we calculate the *Temporal Difference Error* (*Tesauro, 1995; Sutton and Barto, 1998*)  
 506 as  $\delta_t = r_t + \gamma V_t(s_{t+1}) - V_t(s_t)$ . The parameters of the critic,  $\theta^V$ , are updated by

$$\Delta \theta_{i,t}^V = \alpha \delta_t \frac{\partial V_t(s_t)}{\partial \theta_{i,t}^V} , \quad (5)$$

507 where  $\alpha$  represents the learning rate for updating the critic.

The actor is a two layer artificial neural network with 50 hidden units (with  $\tanh$  activation functions) and a two-dimensional output that depicts changes in muscle innervation for the two relevant eye muscles (lateral and medial rectus). The generated motor outputs are random in the beginning and the network is updated whenever the given reward was higher than estimated by the critic:

$$\text{IF } \delta_t > 0 : \quad \Delta \theta_{i,t}^A = \beta (a_t - A_t(s_t)) \frac{\partial A_t(s_t)}{\partial \theta_{i,t}^A} \left[ \frac{\delta_t}{\sqrt{\text{var}_t}} \right] , \quad (6)$$

508 where  $\beta$  is the actor's learning rate,  $A_t(s_t)$  is the action selected by the actor at time  $t$ , and  
 509  $a_t = A_t(s_t) + \mathcal{N}(0, \sigma^2)$  is the action that is actually executed. Adding Gaussian noise to the actor's  
 510 output to discover more favourable actions is called *Gaussian exploration*. The last term scales the  
 511 update depending on how much better the action was than expected with respect to its standard  
 512 deviation.



## 513 **Simulation of alternate rearing conditions**

514 The deprivation of oriented edges is simulated by convolving the input images with elongated  
515 Gaussian kernels defined by:

$$K_{\sigma_x, \sigma_y}(x, y) = \exp\left(-\left(\frac{x^2}{2\sigma_x^2} + \frac{y^2}{2\sigma_y^2}\right)\right), \quad (7)$$

516 where  $\sigma_{x/y}$  represent the standard deviation in the horizontal/vertical direction.

517 Kernels with a large  $\sigma_x$  ( $\sigma_y$ ) will blur out vertical (horizontal) edges. Specifically, to simulate the  
518 deprivation of horizontal orientations,  $\sigma_x$  is set to 33 px (to cover one patch in the coarse scale  
519 completely) and  $\sigma_y$  to a small value of 0.1 px. The numbers are reversed for the deprivation of  
520 vertical orientations. In the case of orthogonal rearing, the left eye receives an image deprived of  
521 horizontal orientations while the right eye receives one without vertical orientations. To make up  
522 for the small standard deviation of 0.1 in the direction that should not be impaired, the images in  
523 the *normal* case are convolved with a Gaussian kernel with  $\sigma_x = \sigma_y = 0.1$  px.

524 To simulate monocular deprivation (MD) we set  $\sigma_x = \sigma_y = 240$  px for the right input image only.  
525 The small patches that we extract from this strongly blurred image contain almost no high spatial  
526 frequencies.

527 A strabismus is artificially induced by rotating the right eye ball inwards as it is commonly done  
528 in biological experiments by fixating a prism in front of the eye or by cutting the lateral rectus  
529 muscle. In our Open-Eye-Simulator, however, we can rotate the eye by a specific angle. One input  
530 patch in the coarse scale covers 6.6°. When we set the strabismic angle to 3° there is still an overlap  
531 in the input images that will be reflected in the neural code. In contrast, when the strabismic angle  
532 is set to 10°, the input patches become completely uncorrelated. Examples of the changes done to  
533 the input images are displayed in Fig. 2.

## 534 **Analysis of receptive fields**

535 To determine the orientations of the basis functions (BFs) we use MATLAB's implementation of the  
536 *trust region reflective algorithm* for non-linear curve fitting (*Coleman and Li (1996)*) to fit them to  
537 two-dimensional Gabor functions as defined by:

$$G(x, y, \theta, f, \psi, \sigma, \xi) = \exp\left(-\frac{x'^2 + \xi^2 y'^2}{2\sigma^2}\right) \cos(2\pi f x' + \psi), \quad (8)$$

538 with  $x' = x \cos(\theta) + y \sin(\theta)$  and  $y' = -x \sin(\theta) + y \cos(\theta)$ .

539 Here,  $f$  denotes the frequency,  $\psi$  the phase offset,  $\sigma$  the standard deviation of the Gaussian  
540 envelope,  $\xi$  the spatial aspect ratio and  $\theta$  the orientation, where  $\theta = 0$  deg corresponds to a vertically  
541 oriented Gabor function. We initialize the parameters randomly 150 times and fit the function  
542 either to the left or right BFs (or to both, see below). To evaluate the quality of the fits, we record  
543 the difference between the actual BFs and the Gabor fit. More specifically, the *residual* is defined as  
544 the sum of the squared differences in single pixel values between BFs and the fit. To compare the  
545 fits across the different experimental conditions, we only took those fits where this residual was  
546 less than or equal to 0.2. This accounts for more than 96% of all BFs in the healthy case.

547 Another interpretation for these fits is a stimulus that maximally activates the particular neuron.  
548 To investigate the binocularity of such a cell, we compare their monocular response to the left and  
549 right Gabor fit. The eye with the greater response is the dominant eye for this neuron. Similar as in  
550 *Hubel and Wiesel (1962)* we show the best stimulus (here the Gabor fit) to the dominant eye and  
551 the same stimulus to the non-dominant eye and record the responses  $L$  and  $R$ . We then compare  
552 these by

$$b = \frac{R - L}{R + L} \quad (9)$$

553 to get a binocularity index between -1 (monocular left) and +1 (monocular right), where 0 means  
554 perfectly binocular.

555 When fitting this function to binocular BFs, we assume that all parameters are equal for the left  
556 and right monocular sub-region of the BFs except for the phase offset  $\psi$ , that can be different for  
557 left and right eye. Following the assumption that the disparity tuning in a binocular cell is encoded  
558 by means of this phase shift, we can calculate the preferred disparity  $d$  of a neuron by:

$$d = \frac{\psi_L - \psi_R}{2\pi\theta f}. \quad (10)$$

559 The maximally detectable disparity is given by the RF size, that is, the visual angle one binocular  
560 patch covers. BFs with a disparity preference bigger than that are excluded from the analysis.

### 561 **Laplacian disparity distribution**

562 The probability density distribution of a Laplacian distributed random variable  $X$  is defined as

$$p(x) = ce^{-s|x-\mu|}, \quad A < x < B, \quad (11)$$

563 To simulate the disparity distribution we set  $\mu$  to the angle that is desired to fixate an object at a  
564 certain distance  $d_o$ ,

$$\mu = 2 \arctan\left(\frac{d_I}{2d_o}\right), \quad (12)$$

565 where  $d_I = 56$  cm is the interpupillary distance. The data shown in Fig. 8B are generated from a  
566 model with only the fine scale, for simplicity.

### 567 **Acknowledgments**

568 This work was supported by the German Federal Ministry of Education and Research under Grants  
569 01GQ1414 and 01EW1603A (within the frame of ERA-NET NEURON), the European Union's Horizon  
570 2020 Grant 713010, the Hong Kong Research Grants Council under Grant 16244416, and the Quandt  
571 Foundation.

### 572 **References**

- 573 **Appelle S.** Perception and discrimination as a function of stimulus orientation: the " oblique effect" in man and  
574 animals. *Psychological bulletin.* 1972; 78(4):266.
- 575 **Barlow HB.** Possible principles underlying the transformations of sensory messages. *Sensory Communication.*  
576 1961; .
- 577 **Blake R, Wilson H.** Binocular vision. *Vision research.* 2011; 51(7):754-770.
- 578 **Chen Y, Qian N.** A coarse-to-fine disparity energy model with both phase-shift and position-shift receptive field  
579 mechanisms. *Neural Computation.* 2004; 16(8):1545-1577.
- 580 **Coleman TF, Li Y.** An interior trust region approach for nonlinear minimization subject to bounds. *SIAM Journal*  
581 *on optimization.* 1996; 6(2):418-445.
- 582 **Coppola DM, Purves HR, McCoy AN, Purves D.** The distribution of oriented contours in the real world. *Proceed-*  
583 *ings of the National Academy of Sciences.* 1998; 95(7):4002-4006.
- 584 **Crowley JC, Katz LC.** Early development of ocular dominance columns. *Science.* 2000; 290(5495):1321-1324.
- 585 **Curcio CA, Sloan KR, Kalina RE, Hendrickson AE.** Human photoreceptor topography. *Journal of comparative*  
586 *neurology.* 1990; 292(4):497-523.
- 587 **Dan Y, Atick JJ, Reid RC.** Efficient coding of natural scenes in the lateral geniculate nucleus: experimental test of  
588 a computational theory. *Journal of Neuroscience.* 1996; 16(10):3351-3362.
- 589 **Daugman JG.** Uncertainty relation for resolution in space, spatial frequency, and orientation optimized by  
590 two-dimensional visual cortical filters. *JOSA A.* 1985; 2(7):1160-1169.
- 591 **Daw NW.** Critical periods and amblyopia. *Archives of ophthalmology.* 1998; 116(4):502-505.

- 592 **De Valois RL**, Albrecht DG, Thorell LG. Spatial frequency selectivity of cells in macaque visual cortex. *Vision*  
593 *research*. 1982; 22(5):545–559.
- 594 **De Valois RL**, Yund EW, Hepler N. The orientation and direction selectivity of cells in macaque visual cortex.  
595 *Vision research*. 1982; 22(5):531–544.
- 596 **Ding J**, Levi DM. Recovery of stereopsis through perceptual learning in human adults with abnormal binocular  
597 vision. *Proceedings of the National Academy of Sciences*. 2011; 108(37):E733–E741.
- 598 **Doi E**, Gauthier JL, Field GD, Shlens J, Sher A, Greschner M, Machado TA, Jepson LH, Mathieson K, Gunning  
599 DE, et al. Efficient coding of spatial information in the primate retina. *Journal of Neuroscience*. 2012;  
600 32(46):16256–16264.
- 601 **Eckmann S**, Klimmasch L, Shi BE, Triesch J. Active Efficient Coding Explains the Development of Binocular Vision  
602 and its Failure in Amblyopia. *bioRxiv*. 2019; p. 571802.
- 603 **Fawcett SL**, Wang YZ, Birch EE. The critical period for susceptibility of human stereopsis. *Investigative*  
604 *ophthalmology & visual science*. 2005; 46(2):521–525.
- 605 **Fleet DJ**, Wagner H, Heeger DJ. Neural encoding of binocular disparity: energy models, position shifts and phase  
606 shifts. *Vision research*. 1996; 36(12):1839–1857.
- 607 **Fox R**, Aslin RN, Shea SL, Dumais ST. Stereopsis in human infants. *Science*. 1980; 207(4428):323–324.
- 608 **Franz A**, Triesch J. Emergence of disparity tuning during the development of vergence eye movements. In: 2007  
609 *IEEE 6th International Conference on Development and Learning IEEE*; 2007. p. 31–36.
- 610 **Fregnac Y**, Trotter Y, Bienenstock E, Buisseret P, Gary-Bobo E, Imbert M. Effect of neonatal unilateral enucleation  
611 on the development of orientation selectivity in the primary visual cortex of normally and dark-reared kittens.  
612 *Experimental brain research*. 1981; 42(3-4):453–466.
- 613 **Furmanski CS**, Engel SA. An oblique effect in human primary visual cortex. *Nature neuroscience*. 2000; 3(6):535.
- 614 **Gopal SK**, Kelkar J, Kelkar A, Pandit A. Simplified updates on the pathophysiology and recent developments in  
615 the treatment of amblyopia: A review. *Indian journal of ophthalmology*. 2019; 67(9):1392.
- 616 **Grondman I**, Busoniu L, Lopes GA, Babuska R. A survey of actor-critic reinforcement learning: Standard and  
617 natural policy gradients. *IEEE Transactions on Systems, Man, and Cybernetics, Part C (Applications and*  
618 *Reviews)*. 2012; 42(6):1291–1307.
- 619 **Held R**, Birch E, Gwiazda J. Stereoacuity of human infants. *Proceedings of the National Academy of Sciences*.  
620 1980; 77(9):5572–5574.
- 621 **Hirsch HV**, Spinelli D. Visual experience modifies distribution of horizontally and vertically oriented receptive  
622 fields in cats. *Science*. 1970; 168(3933):869–871.
- 623 **Hubel DH**, Wiesel TN. Receptive fields, binocular interaction and functional architecture in the cat's visual cortex.  
624 *The Journal of physiology*. 1962; 160(1):106–154.
- 625 **Hubel DH**, Wiesel TN. Binocular interaction in striate cortex of kittens reared with artificial squint. *Journal of*  
626 *neurophysiology*. 1965; 28(6):1041–1059.
- 627 **Hunt JJ**, Dayan P, Goodhill GJ. Sparse coding can predict primary visual cortex receptive field changes induced  
628 by abnormal visual input. *PLoS computational biology*. 2013; 9(5):e1003005.
- 629 **Jordan MI**, Mitchell TM. Machine learning: Trends, perspectives, and prospects. *Science*. 2015; 349(6245):255–  
630 260.
- 631 **Julesz B**. Foundations of cyclopean perception. . 1971; .
- 632 **Kandel ER**, Schwartz JH, Jessell TM, of Biochemistry D, Jessell MBT, Siegelbaum S, Hudspeth A. Principles of  
633 neural science, vol. 4. McGraw-hill New York; 2000.
- 634 **Klimmasch L**, Lelais A, Lichtenstein A, Shi BE, Triesch J. Learning of Active Binocular Vision in a Biomechanical  
635 Model of the Oculomotor System. *bioRxiv*. 2017; p. 160721.
- 636 **Kotsiantis SB**, Zaharakis I, Pintelas P. Supervised machine learning: A review of classification techniques.  
637 *Emerging artificial intelligence applications in computer engineering*. 2007; 160:3–24.

- 638 **Le Vay S**, Wiesel TN, Hubel DH. The development of ocular dominance columns in normal and visually deprived  
639 monkeys. *Journal of Comparative Neurology*. 1980; 191(1):1-51.
- 640 **Leventhal AG**, Hirsch HV. Cortical effect of early selective exposure to diagonal lines. *Science*. 1975;  
641 190(4217):902-904.
- 642 **Li B**, Peterson MR, Freeman RD. Oblique effect: a neural basis in the visual cortex. *Journal of neurophysiology*.  
643 2003; 90(1):204-217.
- 644 **Lonini L**, Forestier S, Teulière C, Zhao Y, Shi BE, Triesch J. Robust active binocular vision through intrinsically  
645 motivated learning. *Frontiers in Neurorobotics*; 2013.
- 646 **Mallat SG**, Zhang Z. Matching pursuits with time-frequency dictionaries. *IEEE Transactions on Signal Processing*.  
647 1993; 41(12):3397-3415.
- 648 **Okuda FC**, Apt L, Wanter BS. Evaluation of the TNO random-dot stereogram test. *American Orthoptic Journal*.  
649 1977; 27(1):124-130.
- 650 **Olmos A**, Kingdom F, McGill calibrated colour image database; 2004.
- 651 **Olmos A**, Kingdom FA. A biologically inspired algorithm for the recovery of shading and reflectance images.  
652 *Perception*. 2004; 33(12):1463-1473.
- 653 **Olshausen BA**, Field DJ. Sparse Coding with an Overcomplete Basis Set: A Strategy Employed by V1? *Vision*  
654 *Research*. 1997; 37(23):3311-3325.
- 655 **Olshausen BA**, et al. Emergence of simple-cell receptive field properties by learning a sparse code for natural  
656 images. *Nature*. 1996; 381(6583):607-609.
- 657 **Papageorgiou E**, Asproudis I, Maconachie G, Tsironi EE, Gottlob I. The treatment of amblyopia: current practice  
658 and emerging trends. *Graefes Archive for Clinical and Experimental Ophthalmology*. 2019; p. 1-18.
- 659 **Priamikov A**, Fronius M, Shi B, Triesch J. OpenEyeSim: A biomechanical model for simulation of closed-loop  
660 visual perception. *Journal of Vision*. 2016; 16(15):25-25.
- 661 **Priamikov A**, Triesch J. Openeyesim-a platform for biomechanical modeling of oculomotor control. In: *IEEE*  
662 *International Conference on Development and Learning and on Epigenetic Robotics*; 2014. p. 394-395.
- 663 **Ringach DL**, Hawken MJ, Shapley R. Dynamics of orientation tuning in macaque primary visual cortex. *Nature*.  
664 1997; 387(6630):281.
- 665 **Rothkopf CA**, Weisswange TH, Triesch J. Learning independent causes in natural images explains the space-  
666 variant oblique effect. In: *2009 IEEE 8th International Conference on Development and Learning IEEE*; 2009. p.  
667 1-6.
- 668 **Ruttum MS**. Visual screening with random dot stereograms. In: *Seminars in Ophthalmology*, vol. 3 Taylor &  
669 Francis; 1988. p. 175-180.
- 670 **Shlaer R**. Shift in binocular disparity causes compensatory change in the cortical structure of kittens. *Science*.  
671 1971; 173(3997):638-641.
- 672 **Simoncelli EP**. Vision and the statistics of the visual environment. *Current opinion in neurobiology*. 2003;  
673 13(2):144-149.
- 674 **Smith EC**, Lewicki MS. Efficient auditory coding. *Nature*. 2006; 439(7079):978-982.
- 675 **Sprague WW**, Cooper EA, Tošić I, Banks MS. Stereopsis is adaptive for the natural environment. *Science*  
676 *advances*. 2015; 1(4):e1400254.
- 677 **Stevenson SB**, Cormack LK, Schor CM, Tyler CW. Disparity tuning in mechanisms of human stereopsis. *Vision*  
678 *research*. 1992; 32(9):1685-1694.
- 679 **Stidwill D**, Fletcher R. Normal binocular vision: Theory, investigation and practical aspects. John Wiley & Sons;  
680 2017.
- 681 **Stryker MP**, Sherk H, Leventhal AG, Hirsch HV. Physiological consequences for the cat's visual cortex of  
682 effectively restricting early visual experience with oriented contours. *Journal of Neurophysiology*. 1978;  
683 41(4):896-909.

- 684 **Sun P**, Gardner JL, Costagli M, Ueno K, Waggoner RA, Tanaka K, Cheng K. Demonstration of tuning to stimulus  
685 orientation in the human visual cortex: a high-resolution fMRI study with a novel continuous and periodic  
686 stimulation paradigm. *Cerebral Cortex*. 2012; 23(7):1618–1629.
- 687 **Sutton RS**, Barto AG. Reinforcement Learning: An Introduction, vol. 1. MIT press Cambridge; 1998.
- 688 **Tanaka S**, Ribot J, Imamura K, Tani T. Orientation-restricted continuous visual exposure induces marked  
689 reorganization of orientation maps in early life. *Neuroimage*. 2006; 30(2):462–477.
- 690 **Tesauro G**. Temporal difference learning and TD-Gammon. *Communications of the ACM*. 1995; 38(3):58–68.
- 691 **Umberger BR**, Gerritsen KG, Martin PE. A model of human muscle energy expenditure. *Computer Methods in*  
692 *Biomechanics and Biomedical Engineering*. 2003; 6(2):99–111.
- 693 **Van Hasselt H**, Wiering MA. Reinforcement learning in continuous action spaces. In: *IEEE International*  
694 *Symposium on Approximate Dynamic Programming and Reinforcement Learning*; 2007. p. 272–279.
- 695 **Vinje WE**, Gallant JL. Sparse coding and decorrelation in primary visual cortex during natural vision. *Science*.  
696 2000; 287(5456):1273–1276.
- 697 **Walraven J**. Amblyopia screening with random-dot stereograms. *American journal of ophthalmology*. 1975;  
698 80(5):893–900.
- 699 **Welford B**. Note on a method for calculating corrected sums of squares and products. *Technometrics*. 1962;  
700 4(3):419–420.
- 701 **Wiesel TN**, Hubel DH. Single-cell responses in striate cortex of kittens deprived of vision in one eye. *Journal of*  
702 *neurophysiology*. 1963; 26(6):1003–1017.
- 703 **Yacoub E**, Harel N, Uğurbil K. High-field fMRI unveils orientation columns in humans. *Proceedings of the*  
704 *National Academy of Sciences*. 2008; 105(30):10607–10612.
- 705 **Young IT**. Proof without prejudice: use of the Kolmogorov-Smirnov test for the analysis of histograms from flow  
706 systems and other sources. *Journal of Histochemistry & Cytochemistry*. 1977; 25(7):935–941.
- 707 **Zhao Y**, Rothkopf CA, Triesch J, Shi BE. A unified model of the joint development of disparity selectivity and  
708 vergence control. In: *IEEE International Conference on Development and Learning and Epigenetic Robotics (ICDL)*;  
709 2012. p. 1–6.

710 **Appendix 1**

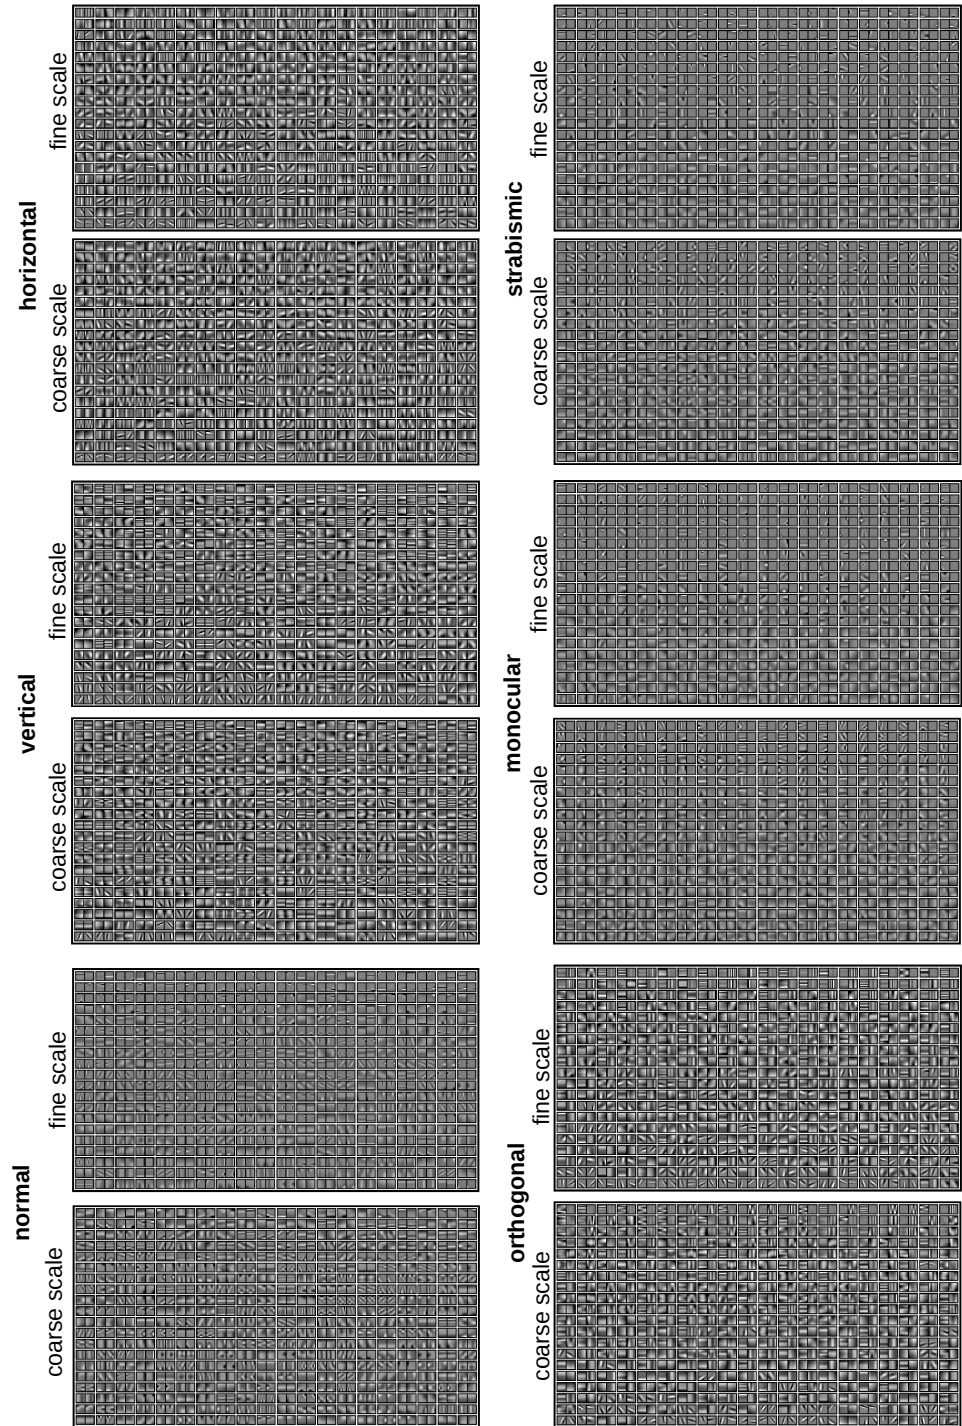

**Appendix 1 Figure 1.** Complete set of all BFs that are learned during training for all different rearing conditions.

715 **Appendix 2**

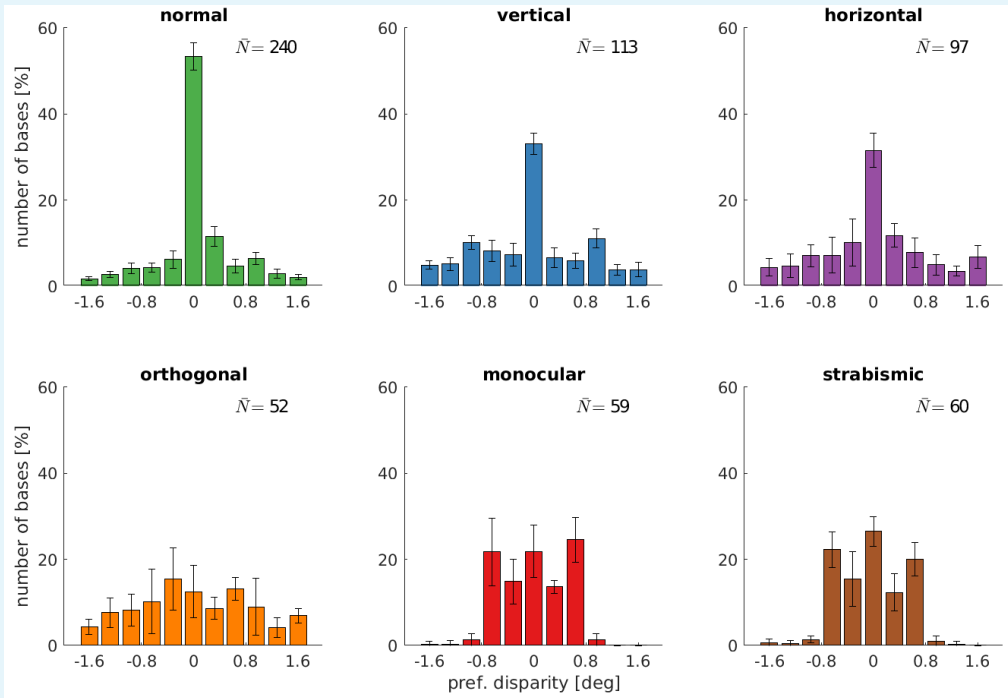

716

717

718

**Appendix 2 Figure 1.** Disparity tuning of the fine scale of models that were trained under different rearing conditions.

720 **Appendix 3**

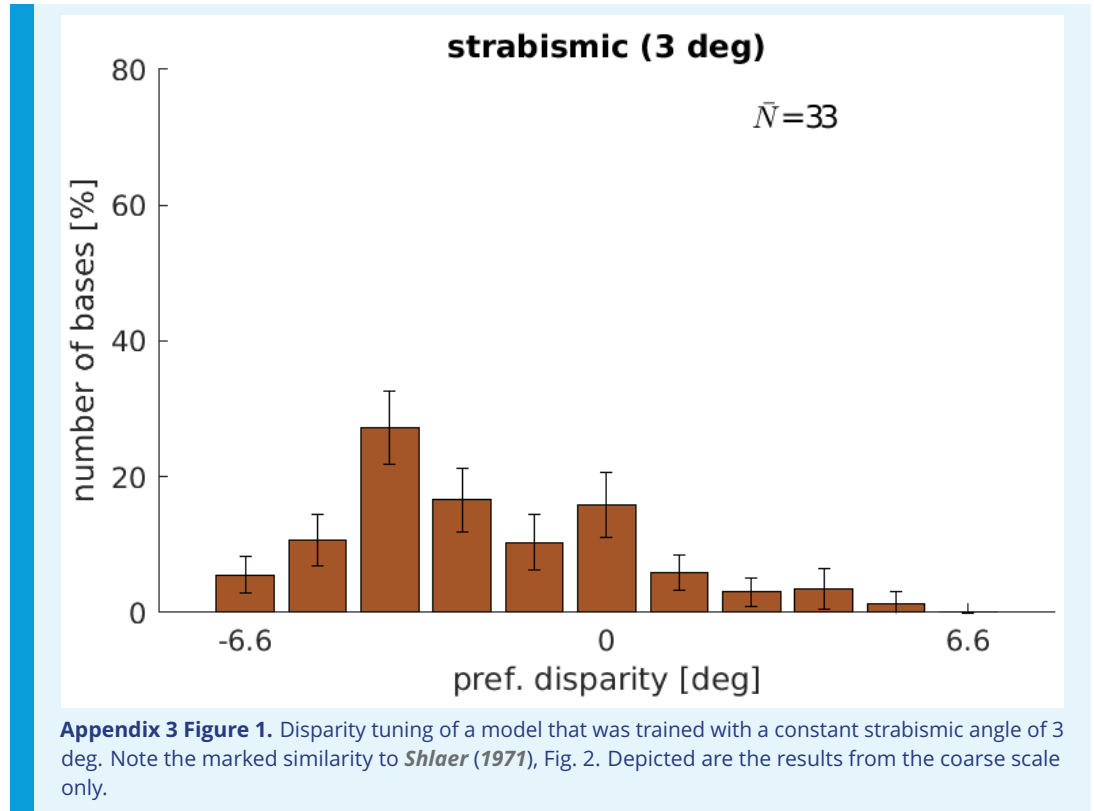

Source: http://biorxiv.org/content/10.1101/2020.02.20.957449v1.full.pdf
